# Supplementary material
Source: PubMed Central journal article supplement (PMC10992611)

**Supplementary Table 1. Best objective response evaluated by RECIST1.1 in different Child-Pugh class and tumor risk subgroups**

| Parameter, n(%) | Child-Pugh class  |                   |                | Tumor risk                   |                               |                |
|-----------------|-------------------|-------------------|----------------|------------------------------|-------------------------------|----------------|
|                 | Child A<br>(n=51) | Child B<br>(n=20) | <i>p</i> Value | Low-risk<br>tumors<br>(n=43) | High-risk<br>tumors<br>(n=28) | <i>p</i> Value |
| CR              | 1(2)              | 0(0)              | 1.000          | 1(2.3)                       | 0(0)                          | 1.000          |
| PR              | 14(27.5)          | 5(25)             | 0.834          | 12(27.9)                     | 7(25)                         | 0.787          |
| SD              | 26(51)            | 10(50)            | 0.941          | 19(44.2)                     | 17(60.7)                      | 0.173          |
| PD              | 10(19.6)          | 5(25)             | 1.000          | 11(25.6)                     | 4(14.3)                       | 0.181          |
| ORR             | 15(29.4)          | 5(25)             | 0.710          | 13(30.2)                     | 7(25)                         | 0.632          |
| DCR             | 41(80.4)          | 15(75)            | 0.748          | 32(74.4)                     | 24(85.7)                      | 0.254          |

CR, complete response; DCR, disease control rate; ORR, objective response rate; PD, progressive disease; PR, partial response; SD, stable disease.

**Supplementary Table 2. Treatment related adverse events**

| Symptom, n(%)           | Any grade    |                    |                              |                | Grade 3 or 4 |                    |                              |
|-------------------------|--------------|--------------------|------------------------------|----------------|--------------|--------------------|------------------------------|
|                         | All patients | First-line setting | Systemic therapy-experienced | <i>p</i> Value | All patients | First-line setting | Systemic therapy-experienced |
|                         | (n=71)       | (n=44)             | (n=27)                       |                | (n=71)       | (n=44)             | (n=27)                       |
| Fatigue                 | 40(56.3)     | 25(56.8)           | 15(55.6)                     | 0.917          | 1(1.4)       | 1(2.3)             | 0(0)                         |
| Hypertension            | 35(49.3)     | 25(56.8)           | 10(37)                       | 0.106          | 3(4.2)       | 1(2.3)             | 1(3.7)                       |
| Palmar-plantar syndrome | 33(46.5)     | 24(54.5)           | 9(33.3)                      | 0.082          | 1(1.4)       | 1(2.3)             | 0(0)                         |
| Decreased appetite      | 29(40.8)     | 19(43.2)           | 10(37)                       | 0.609          | 3(4.2)       | 2(4.5)             | 1(3.7)                       |
| Hypothyroidism          | 27(38)       | 20(45.5)           | 7(25.9)                      | 0.100          | 0(0)         | 0(0)               | 0(0)                         |
| Diarrhea                | 20(28.2)     | 11(25)             | 9(33.3)                      | 0.449          | 2(2.8)       | 1(2.3)             | 1(3.7)                       |
| Pruritis                | 19(26.8)     | 7(15.9)            | 12(44.4)                     | 0.008          | 0(0)         | 0(0)               | 0(0)                         |
| Laryngeal inflammation  | 18(25.4)     | 13(29.5)           | 5(18.5)                      | 0.300          | 0(0)         | 0(0)               | 0(0)                         |
| Proteinuria*            | 17(25.8)     | 12(30)             | 5(19.2)                      | 0.328          | 0(0)         | 0(0)               | 0(0)                         |
| Hepatitis               | 8(11.3)      | 5(11.4)            | 3(11.1)                      | 0.974          | 5(7)         | 3(6.8)             | 2(7.4)                       |
| Poriasis                | 3(4.2)       | 3(6.8)             | 0(0)                         | 0.283          | 3(4.2)       | 3(6.8)             | 0(0)                         |
| Pneumonitis             | 3(4.2)       | 3(6.8)             | 0(0)                         | 0.283          | 2(2.8)       | 2(4.5)             | 0(0)                         |

\*Available data for 66 patients, including 40 patients in first-line setting.

**Supplementary Table 3. Treatment related adverse events in different Child-Pugh class and tumor risk subgroups**

| Symptom, n(%)           | Child-Pugh class  |                   |                   |                   | Tumor risk                   |                              |                              |                              |
|-------------------------|-------------------|-------------------|-------------------|-------------------|------------------------------|------------------------------|------------------------------|------------------------------|
|                         | Any grade         |                   | Grade 3 or 4      |                   | Any grade                    |                              | Grade 3 or 4                 |                              |
|                         | Child A<br>(n=51) | Child B<br>(n=20) | Child A<br>(n=51) | Child B<br>(n=20) | Low-<br>risk tumor<br>(n=43) | High-risk<br>tumor<br>(n=28) | Low-<br>risk tumor<br>(n=43) | High-risk<br>tumor<br>(n=28) |
| Fatigue                 | 30(58.8)          | 10(50)            | 0(0)              | 1(5)              | 23(53.5)                     | 17(60.7)                     | 0(0)                         | 1(3.6)                       |
| Hypertension            | 26(51)            | 9(45)             | 2(3.9)            | 1(5)              | 20(46.5)                     | 15(53.6)                     | 3(7)                         | 0(0)                         |
| Palmar-plantar syndrome | 26(51)            | 7(35)             | 1(2)              | 0(0)              | 24(55.8)                     | 9(32.1)                      | 0(0)                         | 1(3.6)                       |
| Decreased appetite      | 20(39.2)          | 9(45)             | 1(2)              | 2(10)             | 15(34.9)                     | 14(50.0)                     | 0(0)                         | 3(10.7)                      |
| Hypothyroidism          | 19(37.3)          | 8(40)             | 0(0)              | 0(0)              | 15(34.9)                     | 12(42.9)                     | 0(0)                         | 0(0)                         |
| Diarrhea                | 16(31.4)          | 4(20)             | 1(2)              | 1(5)              | 13(30.2)                     | 7(25)                        | 1(2.3)                       | 1(3.6)                       |
| Pruritis                | 16(31.4)          | 3(15)             | 0(0)              | 0(0)              | 13(30.2)                     | 6(21.4)                      | 0(0)                         | 0(0)                         |
| Laryngeal inflammation  | 13(15.5)          | 5(25)             | 0(0)              | 0(0)              | 8(18.6)                      | 10(35.7)                     | 0(0)                         | 0(0)                         |
| Proteinuria*            | 12(26.1)          | 5(25)             | 0(0)              | 0(0)              | 10(25.6)                     | 7(25.9)                      | 0(0)                         | 0(0)                         |
| Hepatitis               | 6(11.8)           | 2(10)             | 3(5.9)            | 2(10)             | 5(11.6)                      | 3(10.7)                      | 2(4.7)                       | 3(10.7)                      |
| Poriasis                | 2(3.9)            | 1(5)              | 2(3.9)            | 1(5)              | 2(4.7)                       | 1(3.6)                       | 2(4.7)                       | 1(3.6)                       |
| Pneumonitis             | 2(3.9)            | 1(5)              | 1(2)              | 1(5)              | 2(4.7)                       | 1(3.6)                       | 1(2.3)                       | 1(3.6)                       |

**Supplementary Table 4. Univariate and multivariate analyses for factors associated with progression free survival based on RECIST1.1**

| Characteristics                        |                        | Univariate Analysis |             |                | Multivariate Analysis |             |                | Multivariate Analysis |             |                |
|----------------------------------------|------------------------|---------------------|-------------|----------------|-----------------------|-------------|----------------|-----------------------|-------------|----------------|
|                                        |                        | HR                  | 95% CI      | <i>p</i> Value | Model 1               |             |                | Model 2               |             |                |
|                                        |                        |                     |             |                | HR                    | 95% CI      | <i>p</i> Value | HR                    | 95% CI      | <i>p</i> Value |
| Age(yr)                                | >60 vs. ≤60            | 1.544               | 0.816-2.923 | 0.182          |                       |             |                |                       |             |                |
| Gender                                 | Male vs. Female        | 1.282               | 0.503-3.272 | 0.603          |                       |             |                |                       |             |                |
| ECOG≥1                                 | Yes vs. No             | 1.916               | 1.022-3.591 | 0.043          | 1.628                 | 0.848-3.124 | 0.143          | 1.542                 | 0.803-2.962 | 0.193          |
| Etiology (Viral hepatitis)             | Yes vs. No             | 0.625               | 0.317-1.234 | 0.176          |                       |             |                |                       |             |                |
| Tumor number                           | Multiple vs. single    | 0.934               | 0.476-1.833 | 0.843          |                       |             |                |                       |             |                |
| Tumor ≥50% liver volume                | Yes vs. No             | 0.941               | 0.447-1.977 | 0.872          |                       |             |                |                       |             |                |
| Main portal vein invasion              | Yes vs. No             | 0.881               | 0.406-1.909 | 0.881          |                       |             |                |                       |             |                |
| Bile duct involvement                  | Yes vs. No             | 2.225               | 0.530-9.340 | 0.274          |                       |             |                |                       |             |                |
| Extrahepatic metastasis                | Yes vs. No             | 0.976               | 0.525-1.815 | 0.939          |                       |             |                |                       |             |                |
| BCLC stage                             | Stage C vs. B          | 0.990               | 0.457-2.145 | 0.980          |                       |             |                |                       |             |                |
| AFP, ng/mL                             | >400 vs. ≤400          | 1.321               | 0.714-2.445 | 0.375          |                       |             |                |                       |             |                |
| NLR                                    | >2.5 vs. ≤2.5          | 0.965               | 0.470-1.979 | 0.922          |                       |             |                |                       |             |                |
| INR                                    | >1.2 vs. ≤1.2          | 0.546               | 0.282-1.057 | 0.073          | 0.537                 | 0.275-1.050 | 0.069          | 0.617                 | 0.315-1.206 | 0.158          |
| Platelet count                         | >100 vs. ≤100          | 0.581               | 0.295-1.143 | 0.116          |                       |             |                |                       |             |                |
| ALT, U/L                               | >40 vs. ≤40            | 0.622               | 0.334-1.158 | 0.134          |                       |             |                |                       |             |                |
| AST, U/L                               | >40 vs. ≤40            | 0.662               | 0.353-1.244 | 0.200          |                       |             |                |                       |             |                |
| Child–Pugh class                       | Class B vs. A          | 1.701               | 0.873-3.317 | 0.119          |                       |             |                |                       |             |                |
| ALBI grade                             | m2b/ 3 vs. 1/ m2a      | 1.111               | 0.593-2.083 | 0.742          |                       |             |                |                       |             |                |
| Fib-4 score                            | >6.5 vs. ≤6.5          | 1.514               | 0.771-2.973 | 0.228          |                       |             |                |                       |             |                |
| Systemic treatment                     | ≥2nd line vs. 1st line | 1.687               | 0.912-3.121 | 0.096          | 1.651                 | 0.872-3.127 | 0.124          |                       |             |                |
| MKI experience                         | Yes vs. No             | 1.475               | 0.791-2.747 | 0.221          |                       |             |                |                       |             |                |
| Nivolumab experience                   | Yes vs. No             | 3.966               | 1.846-8.518 | <0.001         |                       |             |                | 3.253                 | 1.473-7.183 | 0.004          |
| Early AFP response (≥10%) <sup>a</sup> | Yes vs. No             | 1.099               | 0.469-2.577 | 0.828          |                       |             |                |                       |             |                |
| Early AFP response (any) <sup>b</sup>  | Yes vs. No             | 0.681               | 0.290-1.602 | 0.379          |                       |             |                |                       |             |                |

<sup>a</sup>53 patients with baseline AFP≥10 ng/ml were analyzed; <sup>a</sup> AFP reduction ≥10% within 4 weeks according to 10-10 rule. <sup>b</sup> AFP reduction in any degree within 4 weeks.

AFP, alpha-fetoprotein; ALT, alanine aminotransferase; AST, aspartate aminotransferase; BCLC, Barcelona-Clinic-Liver-Cancer; CI, confidence interval; ECOG, Eastern Cooperative Oncology Group; INR, international normalized ratio; MKI, multikinase inhibitor; NLR, neutrophil-to-lymphocyte ratio.

**Supplementary Table 5. Association of the expression level of Programmed death-ligand 1(PD-L1) with clinical outcomes<sup>a</sup>**

|                         | Best objective response <sup>b</sup> |          |                | Progression free survival <sup>b</sup><br>(≥1% vs. <1%) |             |                             | Overall survival<br>(≥1% vs. <1%) |             |                             |
|-------------------------|--------------------------------------|----------|----------------|---------------------------------------------------------|-------------|-----------------------------|-----------------------------------|-------------|-----------------------------|
|                         | <1%                                  | ≥1%      | <i>p</i> value | HR                                                      | 95% CI      | <i>p</i> Value <sup>†</sup> | HR                                | 95% CI      | <i>p</i> Value <sup>c</sup> |
| Combined positive score | 7(23.3%)                             | 9(50%)   | 0.058          | 0.489                                                   | 0.203-1.177 | 0.110                       | 0.226                             | 0.049-1.032 | 0.055                       |
| Tumor proportion score  | 9(25%)                               | 7(58.3%) | 0.073          | 0.537                                                   | 0.200-1.439 | 0.216                       | 0.208                             | 0.027-1.599 | 0.131                       |

<sup>a</sup>Of 48 patients with available PD-L1 expression data. <sup>b</sup>Best objective response and progression-free survival are reviewed by RECIST v1.1. <sup>c</sup>*p* values are for the association of PD-L1 expression with overall survival and progression-free survival by use of Cox regression.

**Supplementary Figure 1. Kaplan-Meier curves of patients with nivolumab +/- MKI or MKI alone treatment experienced compared with patients received lenvatinib plus pembrolizumab as first-line treatment. (a) progression-free survival [PFS] by RECIST v1.1 (b) Overall survival [OS]**

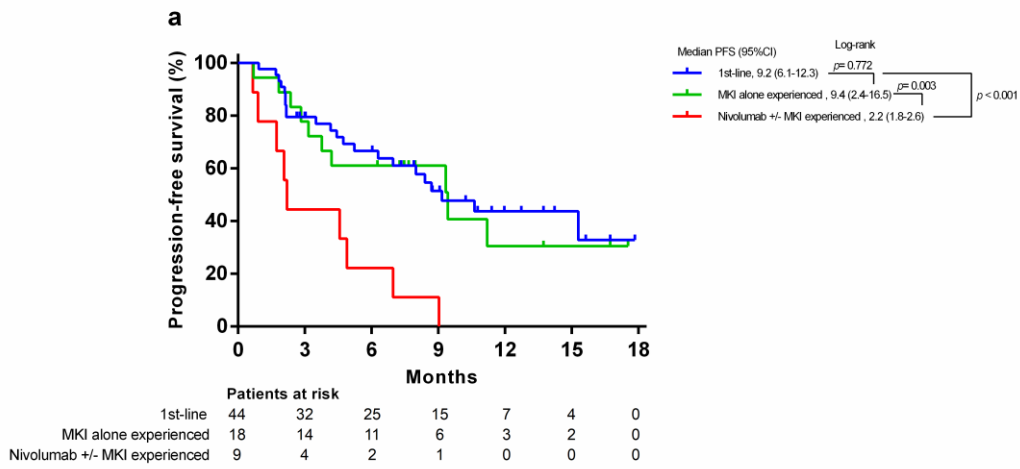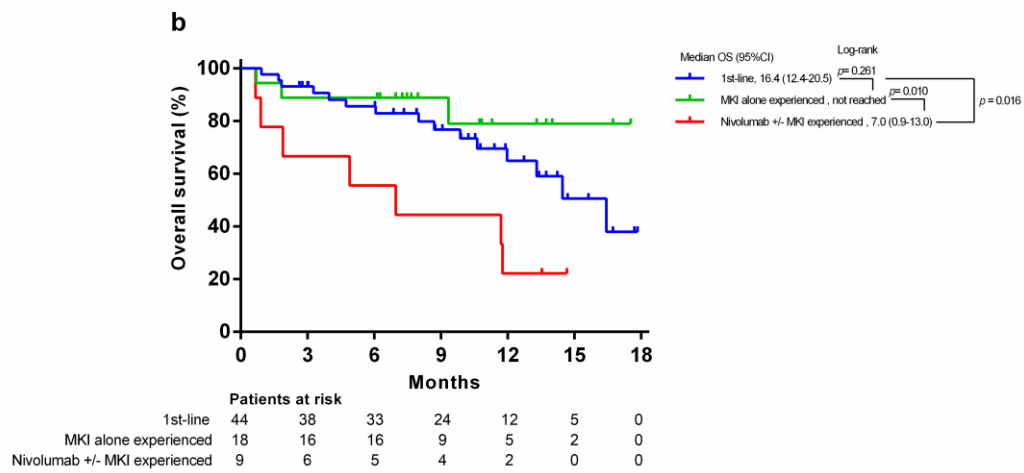

Supplement: 262_2022_3185_MOESM1_ESM.pdf [file 262_2022_3185_MOESM1_ESM.pdf]
